# Supplementary material
Source: HighWire-hosted journal article supplement (https://bmjopen.bmj.com/content/12/1/e050187)
Supplement: inline-supplementary-material-2 [file inline-supplementary-material-2.pdf]

**Supplemental Table 2.** Oxford University first-year student percentage reporting overall and by gender. *Could you describe the impact that the COVID-19 pandemic and associated social distancing have had on:*

|                                                                        | TOTAL<br>(n=339)* | GENDER          |                   | p**    |
|------------------------------------------------------------------------|-------------------|-----------------|-------------------|--------|
|                                                                        |                   | Male<br>(n=121) | Female<br>(n=209) |        |
| Your university studies?                                               |                   |                 |                   |        |
| Negative                                                               | 69.9              | 70.2            | 69.4              | 0.90   |
| Neutral                                                                | 21.8              | 20.7            | 22.5              |        |
| Positive                                                               | 8.3               | 9.1             | 8.1               |        |
| Your plans to continue at university?                                  |                   |                 |                   |        |
| Negative                                                               | 14.2              | 5.0             | 19.6              | <0.001 |
| Neutral                                                                | 80.5              | 90.9            | 74.2              |        |
| Positive                                                               | 5.3               | 4.1             | 6.2               |        |
| Your perception of online/remote learning                              |                   |                 |                   |        |
| Negative                                                               | 30.4              | 25.6            | 33.5              | 0.046  |
| Neutral                                                                | 27.4              | 34.7            | 22.5              |        |
| Positive                                                               | 42.2              | 39.7            | 44.0              |        |
| Your prospects for summer internships/exchanges/academic pursuits?     |                   |                 |                   |        |
| Negative                                                               | 64.0              | 62.0            | 64.1              | 0.33   |
| Neutral                                                                | 32.7              | 36.4            | 31.6              |        |
| Positive                                                               | 3.2               | 1.7             | 4.3               |        |
| Your prospects for summer employment?                                  |                   |                 |                   |        |
| Negative                                                               | 72.6              | 63.6            | 77.5              | 0.02   |
| Neutral                                                                | 24.5              | 31.4            | 20.6              |        |
| Positive                                                               | 2.9               | 5.0             | 1.9               |        |
| Your ability to exercise?                                              |                   |                 |                   |        |
| Negative                                                               | 39.2              | 43.8            | 37.3              | 0.17   |
| Neutral                                                                | 34.5              | 35.5            | 32.5              |        |
| Positive                                                               | 26.3              | 20.7            | 30.1              |        |
| Your ability to participate in your usual hobbies/ leisure activities? |                   |                 |                   |        |
| Negative                                                               | 70.8              | 67.8            | 73.2              | 0.49   |
| Neutral                                                                | 20.6              | 24.0            | 18.7              |        |
| Positive                                                               | 8.3               | 7.4             | 8.1               |        |

Notes: (1) \*not all participants reported gender, (2) \*\*p-value for chi-square test
